# Supplementary material for: Applying GRADE-CERQual to qualitative evidence synthesis findings: introduction to the series
Source: Springer Nature journal article supplement (doi:10.1186/s13012-017-0688-3), 2018-01-01
Supplement: MOESM3 [file 15416844]

## Additional file 3: Questions included in the CERQual online feedback form and short individual discussions

*What is your name?*

*What is your institution?*

*What is your email address?*

*What was the name of the review to which you applied GRADE-CERQual?*

*Please list all the names of those who used GRADE-CERQual (including yourself)*

*Was your team applying GRADE-CERQual to their own review or to someone's else's?*

*If the review is published please provide the reference here:*

When did you carry out this work?

Was the review commissioned? (If yes, please indicate who commissioned it)

How did you hear about GRADE-CERQual?

Please indicate which, if any of the following sources of support you accessed while applying GRADE-CERQual:

- Website
- Publications
- CERQual Dropbox folder
- Direct contact with a member of the coordinating team
- Materials received at a seminar or training workshop
- Other:

Please describe your overall experience of applying GRADE-CERQual

What did you find challenging about the GRADE-CERQual approach?

Please describe any examples that exemplify a challenge you faced in assessing the "methodological limitations" component:

Please describe any examples that exemplify a challenge you faced in assessing the "relevance" component:

Please describe any examples that exemplify a challenge you faced in assessing the "adequacy of data" component:

Please describe any examples that exemplify a challenge you faced in assessing the "coherence" component:

Please describe any examples that exemplify a challenge you faced in making an overall assessment of confidence:

Could you have benefitted from additional support? If so, what kinds of support would be useful?

Please share any other feedback regarding your experience of using GRADE-CERQual

What (if applicable) were the reactions of stakeholders/decision-makers to your review findings and the GRADE-CERQual assessments?
